# Supplementary material
Source: Copernicus journal article supplement (doi:10.5194/bg-23-4463-2026)
Supplement: Supplementary file 1 [file Supplementary material for article_revised2.pdf › Supplementary material for article_revised2.pdf]

Supplementary material includes three tables and three Krona-charts as .html-files in a zipped folder.

Table S1: Geochemistry analysis results from the sampled water

| ID      | Ag    | Al   | As   | B    | Ba   | Be   | Bi   | Cd    | Co    | Cr   | Cu   | I    | Li   | Mn   |
|---------|-------|------|------|------|------|------|------|-------|-------|------|------|------|------|------|
|         | 0.01  | 1    | 0.1  | 2    | 0.05 | 0.1  | 1    | 0.02  | 0.05  | 0.2  | 0.1  | 2    | 0.1  | 0.02 |
|         | µg/l  | µg/l | µg/l | µg/l | µg/l | µg/l | µg/l | µg/l  | µg/l  | µg/l | µg/l | µg/l | µg/l | µg/l |
| NOPPA15 | <0.01 | 2.1  | 2.48 | 6.55 | 17.4 | <0.1 | <1   | <0.02 | 1.25  | <0.2 | <0.1 | 10.2 | 4.68 | 426  |
| MIHP6   | <0.01 | 3.12 | 0.2  | 8.59 | 17.2 | <0.1 | <1   | <0.02 | 0.14  | <0.2 | <0.1 | 2.16 | 6.45 | 214  |
| MIHP15  | <0.01 | 1.26 | 3.07 | 7.54 | 22.6 | <0.1 | <1   | <0.02 | <0.05 | <0.2 | <0.1 | 3.88 | 5.66 | 403  |
| R56     | <0.01 | 3.52 | <0.1 | 42   | 1.82 | <0.1 | <1   | <0.02 | <0.05 | <0.2 | 0.14 | 15.4 | 1.39 | 52.3 |
| LOHI30  | <0.01 | 7.01 | 9.52 | 6.99 | 21.5 | <0.1 | <1   | <0.02 | <0.05 | 0.3  | <0.1 | 2.9  | 4.25 | 969  |
| KUU19   | <0.01 | <1   | <0.1 | 2.79 | 6.82 | <0.1 | <1   | <0.02 | <0.05 | 0.55 | <0.1 | 2.37 | 3.69 | 0.68 |
| HÄJY30  | <0.01 | 1.01 | 9.35 | 13.2 | 29.9 | <0.1 | <1   | <0.02 | 0.16  | <0.2 | <0.1 | 5.29 | 4.91 | 594  |
| MIETO17 | <0.01 | 3.28 | 1.03 | 6.41 | 13.9 | <0.1 | <1   | <0.02 | 0.74  | <0.2 | <0.1 | 2.24 | 6    | 654  |
| HARJA10 | <0.01 | 6.69 | 21   | 3.3  | 13.6 | <0.1 | <1   | <0.02 | 2.16  | 1.26 | 0.11 | 2.1  | 2.74 | 563  |
| HÄJY11  | <0.01 | 1.63 | <0.1 | 6.16 | 9.33 | <0.1 | <1   | <0.02 | <0.05 | <0.2 | <0.1 | <2   | 4.18 | 2.29 |

| ID      | Mo   | Ni    | P    | Pb    | Rb   | Sb   | Se   | Sn   | Sr   | Th    | Tl    | U     | V     | Zn   |
|---------|------|-------|------|-------|------|------|------|------|------|-------|-------|-------|-------|------|
|         | 0.1  | 0.05  | 50   | 0.05  | 0.01 | 0.1  | 0.5  | 1    | 0.1  | 0.01  | 0.01  | 0.01  | 0.05  | 0.5  |
|         | µg/l | µg/l  | µg/l | µg/l  | µg/l | µg/l | µg/l | µg/l | µg/l | µg/l  | µg/l  | µg/l  | µg/l  | µg/l |
| NOPPA15 | <0.1 | 1.47  | 129  | <0.05 | 0.5  | <0.1 | <0.5 | <1   | 101  | <0.01 | <0.01 | 0.02  | 0.13  | 0.78 |
| MIHP6   | <0.1 | 0.22  | <50  | <0.05 | 0.16 | <0.1 | <0.5 | <1   | 46.7 | <0.01 | <0.01 | 0.03  | 0.13  | <0.5 |
| MIHP15  | <0.1 | <0.05 | 194  | <0.05 | 0.73 | <0.1 | <0.5 | <1   | 82.7 | <0.01 | <0.01 | <0.01 | 0.07  | <0.5 |
| R56     | <0.1 | <0.05 | 64.8 | <0.05 | 1.95 | <0.1 | <0.5 | <1   | 91.5 | <0.01 | <0.01 | 0.1   | <0.05 | <0.5 |
| LOHI30  | <0.1 | 0.06  | 681  | <0.05 | 0.27 | <0.1 | <0.5 | <1   | 86   | <0.01 | <0.01 | 0.02  | 1.13  | 0.5  |
| KUU19   | <0.1 | 0.42  | <50  | <0.05 | 0.02 | <0.1 | <0.5 | <1   | 38.3 | <0.01 | <0.01 | 0.02  | 0.18  | 5.01 |
| HÄJY30  | <0.1 | 0.08  | 489  | <0.05 | 0.26 | <0.1 | <0.5 | <1   | 107  | <0.01 | <0.01 | 0.02  | 0.11  | 4.68 |
| MIETO17 | <0.1 | 0.58  | 118  | <0.05 | 0.44 | <0.1 | <0.5 | <1   | 70.1 | <0.01 | <0.01 | <0.01 | 0.12  | 1.18 |
| HARJA10 | <0.1 | 2     | 698  | <0.05 | 0.24 | <0.1 | <0.5 | <1   | 74   | 0.01  | <0.01 | 0.04  | 2.48  | 3.61 |
| HÄJY11  | <0.1 | 0.14  | <50  | <0.05 | 0.08 | <0.1 | <0.5 | <1   | 56.5 | <0.01 | <0.01 | 0.02  | 0.25  | 1.21 |

| ID      | Ca   | Fe    | K    | Mg   | Na   | S    | Si   | DOC  | TOC | Br   | Cl  | F   | NO3   | SO4 |
|---------|------|-------|------|------|------|------|------|------|-----|------|-----|-----|-------|-----|
|         | 0.1  | 0.03  | 0.1  | 0.1  | 1    | 0.2  | 0.1  | 0.2  | 0.2 | 0.1  | 0.2 | 0.1 | 0.2   | 0.1 |
|         | mg/l | mg/l  | mg/l | mg/l | mg/l | mg/l | mg/l |      |     |      |     |     |       |     |
| NOPPA15 | 14.8 | 4.32  | 2.08 | 5.27 | 8.45 | 5.87 | 12.6 | 1.9  | 2   | <1.0 | 7.6 | 0.1 | <0.50 | 13  |
| MIHP6   | 8.01 | 0.08  | 1.47 | 4.24 | 9.77 | 0.7  | 11.7 | 1.5  | 1.2 | <1.0 | 1.7 | 0.7 | <0.50 | 2.4 |
| MIHP15  | 11.1 | 4.88  | 1.78 | 5.75 | 8.82 | 0.34 | 14.5 | 0.93 | 1.9 | <1.0 | 2.6 | 0.3 | <0.50 | 1.6 |
| R56     | 10.2 | 0.39  | 1.08 | 2.09 | 46.5 | 0.5  | 8.1  | 1.6  | 2.2 | <1.0 | 25  | 0.9 | <0.50 | 2   |
| LOHI30  | 11.5 | 9.75  | 1.65 | 4.85 | 6.57 | 0.26 | 15.6 | 2.7  | 2.9 | <1.0 | 2.5 | 0.5 | <0.50 | 1.4 |
| KUU19   | 4.71 | <0.03 | 1.12 | 2.34 | 5.39 | 0.39 | 10.7 | 0.93 | 1.5 | <1.0 | 3.4 | 0.1 | 4.6   | 1.6 |
| HÄJY30  | 15.8 | 4.33  | 1.88 | 6.83 | 11.6 | 0.57 | 14.9 | 2    | 1.4 | <1.0 | 4.9 | 0.6 | <0.50 | 1.8 |
| MIETO17 | 8.42 | 1.47  | 1.97 | 4.03 | 8.32 | 0.93 | 14.6 | 1.3  | 1.2 | <1.0 | 2.8 | 0.2 | <0.50 | 2.7 |
| HARJA10 | 7.76 | 31.5  | 1.54 | 3.37 | 4.82 | <0.2 | 16.9 | 6.2  | 4.9 | <1.0 | 5.1 | 0.5 | <0.50 | 1.3 |
| HÄJY11  | 7.52 | <0.03 | 0.91 | 3.31 | 6.99 | 0.64 | 10.7 | 0.85 | 1   | <1.0 | 1.8 | 0.1 | <0.50 | 2.2 |

Table S2. Sequencing statistics and ecological indices of bacteria, archaea and fungi

| BACTERIA |        | input  | filtered | denoisedF | nonchim   | Observed | Shannon | InvSimpson |         |            |
|----------|--------|--------|----------|-----------|-----------|----------|---------|------------|---------|------------|
| HAJY30   | 88888  | 85405  | 82200    | 81763     | 1057      | 3,95     | 6,87    |            |         |            |
| MIETO17  | 111250 | 106901 | 103249   | 101466    | 1834      | 6,52     | 231,53  |            |         |            |
| NOPPA15  | 129603 | 124232 | 117975   | 116287    | 2468      | 6,69     | 198,54  |            |         |            |
| R56      | 116297 | 111468 | 110460   | 109656    | 329       | 2,91     | 6,69    |            |         |            |
| HARJA10  | 130910 | 125196 | 121306   | 120011    | 1897      | 6,25     | 138,12  |            |         |            |
| MIHP15   | 109288 | 104778 | 103311   | 99368     | 548       | 3,63     | 13,7    |            |         |            |
| LOHI30   | 310409 | 298127 | 294683   | 285277    | 3059      | 5,74     | 57,94   |            |         |            |
|          |        |        |          |           |           |          |         |            |         |            |
| ARCHAEA  |        | input  | filtered | denoisedF | nonchim   | Observed | Shannon | InvSimpson |         |            |
| HAJY30   | 180447 | 176050 | 173106   | 169508    | 1064      | 5,25     | 43,97   |            |         |            |
| MIETO17  | 126127 | 122966 | 120371   | 119426    | 670       | 4,67     | 20,45   |            |         |            |
| NOPPA15  | 139103 | 135718 | 132073   | 129952    | 1322      | 5,97     | 155,91  |            |         |            |
| R56      | 127166 | 123781 | 121905   | 120954    | 287       | 3,81     | 19,12   |            |         |            |
| HARJA10  | 143069 | 139093 | 135949   | 133467    | 947       | 5,24     | 35,96   |            |         |            |
| MIHP15   | 186686 | 181007 | 179189   | 178824    | 287       | 2,05     | 3,69    |            |         |            |
|          |        |        |          |           |           |          |         |            |         |            |
| FUNGI    |        | input  | filtered | denoisedF | denoisedR | merged   | nonchim | Observed   | Shannon | InvSimpson |
| HAJY30   | 74756  | 31808  | 31568    | 31177     | 30332     | 30332    | 202     | 3,91       | 22,03   |            |
| MIETO17  | 106318 | 41977  | 41395    | 40931     | 39543     | 39443    | 183     | 3,59       | 15,37   |            |
| NOPPA15  | 97693  | 35631  | 35062    | 34793     | 33596     | 33596    | 218     | 3,83       | 18,72   |            |
| R56      | 95089  | 34793  | 34137    | 33812     | 32020     | 32020    | 266     | 4,04       | 18,02   |            |
| HARJA10  | 150494 | 89321  | 88978    | 88551     | 84325     | 83575    | 261     | 2,66       | 4,80    |            |
| MIHP15   | 125638 | 62057  | 61428    | 60942     | 56223     | 56068    | 197     | 2,22       | 3,05    |            |

Table S3. Prevalence of bacterial and archaeal ASVs in phylum level

| BACTERIA           |                                            |                                              | ARCHAEA             |                                            |                                              |
|--------------------|--------------------------------------------|----------------------------------------------|---------------------|--------------------------------------------|----------------------------------------------|
| Phylum             | any ASV belonging to the phylum on average | total prevalence numbers of all phylum' ASVs | Phylum              | any ASV belonging to the phylum on average | total prevalence numbers of all phylum' ASVs |
| Patescibacteria    | 1.378026                                   | 2220                                         | Nanoarchaeota       | 1.729965                                   | 2979                                         |
| Verrucomicrobiota  | 1.550877                                   | 1768                                         | Micrarchaeota       | 1.716418                                   | 460                                          |
| Chloroflexi        | 1.424125                                   | 1464                                         | Crenarchaeota       | 1.804233                                   | 341                                          |
| Proteobacteria     | 1.301911                                   | 1022                                         | Iainarchaeota       | 1.466102                                   | 173                                          |
| Nanoarchaeota      | 1.404463                                   | 1007                                         | NA                  | 1.586538                                   | 165                                          |
| Bacteroidota       | 1.203463                                   | 556                                          | Aenigmarchaeota     | 1.707865                                   | 152                                          |
| Desulfobacterota   | 1.771127                                   | 503                                          | Thermoplasmatota    | 1.869565                                   | 129                                          |
| Firmicutes         | 1.401099                                   | 255                                          | Halobacterota       | 1.764706                                   | 90                                           |
| Acidobacteriota    | 1.360000                                   | 238                                          | Euryarchaeota       | 1.485714                                   | 52                                           |
| Actinobacteriota   | 1.320755                                   | 210                                          | Altiarchaeota       | 1.700000                                   | 17                                           |
| Nitrospirota       | 1.568182                                   | 207                                          | Hadarchaeota        | 1.875000                                   | 15                                           |
| Micrarchaeota      | 1.320611                                   | 173                                          | Hydrothermarchaeota | 1.000000                                   | 4                                            |
| Sva0485            | 2.047619                                   | 172                                          |                     |                                            |                                              |
| Elusimicrobiota    | 1.226562                                   | 157                                          |                     |                                            |                                              |
| Planctomycetota    | 1.094203                                   | 151                                          |                     |                                            |                                              |
| Myxococcota        | 1.287234                                   | 121                                          |                     |                                            |                                              |
| Iainarchaeota      | 1.391892                                   | 103                                          |                     |                                            |                                              |
| Crenarchaeota      | 1.508772                                   | 86                                           |                     |                                            |                                              |
| Methylomirabilota  | 2.088235                                   | 71                                           |                     |                                            |                                              |
| Spirochaetota      | 1.244898                                   | 61                                           |                     |                                            |                                              |
| Latescibacterota   | 1.270833                                   | 61                                           |                     |                                            |                                              |
| Aenigmarchaeota    | 1.500000                                   | 54                                           |                     |                                            |                                              |
| Bdellovibrionota   | 1.045455                                   | 46                                           |                     |                                            |                                              |
| Cyanobacteria      | 1.166667                                   | 42                                           |                     |                                            |                                              |
| Zixibacteria       | 1.950000                                   | 39                                           |                     |                                            |                                              |
| Halobacterota      | 1.789474                                   | 34                                           |                     |                                            |                                              |
| WOR-1              | 1.476190                                   | 31                                           |                     |                                            |                                              |
| Gemmatimonadota    | 1.428571                                   | 30                                           |                     |                                            |                                              |
| Thermoplasmatota   | 1.588235                                   | 27                                           |                     |                                            |                                              |
| Armatimonadota     | 1.333333                                   | 24                                           |                     |                                            |                                              |
| Fibrobacterota     | 1.150000                                   | 23                                           |                     |                                            |                                              |
| Euryarchaeota      | 1.583333                                   | 19                                           |                     |                                            |                                              |
| Dependentiae       | 1.000000                                   | 18                                           |                     |                                            |                                              |
| DTB120             | 1.062500                                   | 17                                           |                     |                                            |                                              |
| Campylobacterota   | 2.000000                                   | 16                                           |                     |                                            |                                              |
| MBNT15             | 1.555556                                   | 14                                           |                     |                                            |                                              |
| Desantisbacteria   | 1.181818                                   | 13                                           |                     |                                            |                                              |
| Sumerlaeota        | 1.222222                                   | 11                                           |                     |                                            |                                              |
| Nitrospinota       | 1.571429                                   | 11                                           |                     |                                            |                                              |
| Edwardsbacteria    | 2.200000                                   | 11                                           |                     |                                            |                                              |
| Margulisbacteria   | 1.250000                                   | 10                                           |                     |                                            |                                              |
| NKB15              | 2.500000                                   | 10                                           |                     |                                            |                                              |
| TA06               | 1.125000                                   | 9                                            |                     |                                            |                                              |
| CK-2C2-2           | 1.600000                                   | 8                                            |                     |                                            |                                              |
| WS4                | 1.750000                                   | 7                                            |                     |                                            |                                              |
| Caldisericota      | 1.200000                                   | 6                                            |                     |                                            |                                              |
| WPS-2              | 1.200000                                   | 6                                            |                     |                                            |                                              |
| Caldatribacteriota | 3.000000                                   | 6                                            |                     |                                            |                                              |
| FCPU426            | 1.000000                                   | 5                                            |                     |                                            |                                              |
| WS2                | 1.000000                                   | 5                                            |                     |                                            |                                              |
| Hadarchaeota       | 1.666667                                   | 5                                            |                     |                                            |                                              |
| LCP-89             | 2.500000                                   | 5                                            |                     |                                            |                                              |
| Calditrichota      | 1.000000                                   | 4                                            |                     |                                            |                                              |
| Firestonebacteria  | 1.000000                                   | 4                                            |                     |                                            |                                              |
| Schekmanbacteria   | 1.333333                                   | 4                                            |                     |                                            |                                              |
| Abditibacteriota   | 1.000000                                   | 3                                            |                     |                                            |                                              |
| Acetothermia       | 1.000000                                   | 2                                            |                     |                                            |                                              |
| Entotheonellaeota  | 1.000000                                   | 2                                            |                     |                                            |                                              |
| Hydrogenedentes    | 1.000000                                   | 2                                            |                     |                                            |                                              |
| NB1-j              | 1.000000                                   | 2                                            |                     |                                            |                                              |
| TX1A-33            | 1.000000                                   | 1                                            |                     |                                            |                                              |

Figure S1: a) Bacterial b) archaeal and c) fungal communities in groundwater samples, shown as interactive Krona-charts.

Provided as .html -files

Kurikkabac-krona1.html

Kurikkaarc-krona1.html

Kurikkafun-krona1.html

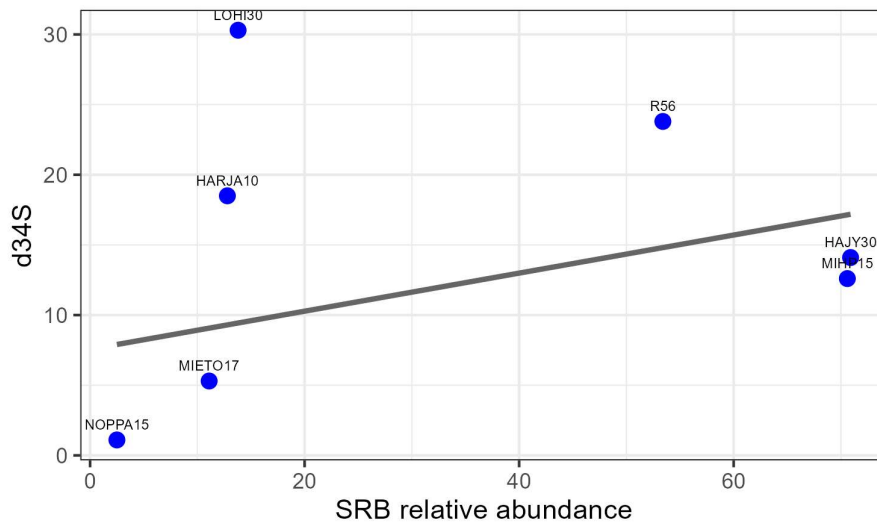

Figure S2. The relation of relative abundance of commonly identified sulphate reducers (Desulfobacterota and Desulfotobacterales among the 25 most abundant orders, see Fig. 5A) plotted against  $\delta^{34}\text{S}$ . LOHI30 excluded from the regression analysis.
