# Supplementary material
Source: Copernicus journal article supplement (doi:10.5194/bg-23-4463-2026)
Supplement: Supplementary file [file bg-23-4463-2026-supplement-title-page.pdf › bg-23-4463-2026-supplement-title-page.pdf]

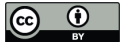

*Supplement of*

## **Combining microbial, isotopic and residence time data to characterize groundwater dynamics in a multi-layered aquifer system in Kurikka, western Finland**

**Lotta Purkamo et al.**

*Correspondence to:* Lotta Purkamo (lotta.purkamo@gtk.fi)

- [bg-23-4463-2026-supplement-title-page.pdf](#)
- [Kurikkaarc-krona1.html](#)
- [Kurikkabac-krona1.html](#)
- [Kurikkafun-krona1.html](#)
- [Supplementary material for article\\_revised2.pdf](#)

The copyright of individual parts of the supplement might differ from the article licence.
